# Supplementary material for: Occurrence and Outcome of Infective Endocarditis after Surgical Compared to Transcatheter Pulmonary Valve Implantation in Congenital Heart Disease
Source: MDPI journal article supplement (doi:10.3390/jcm13092683), 2024-05-02

## Supplementary online only material

---

**Figure S1:** Flow-chart of the selection process and cohort definition.

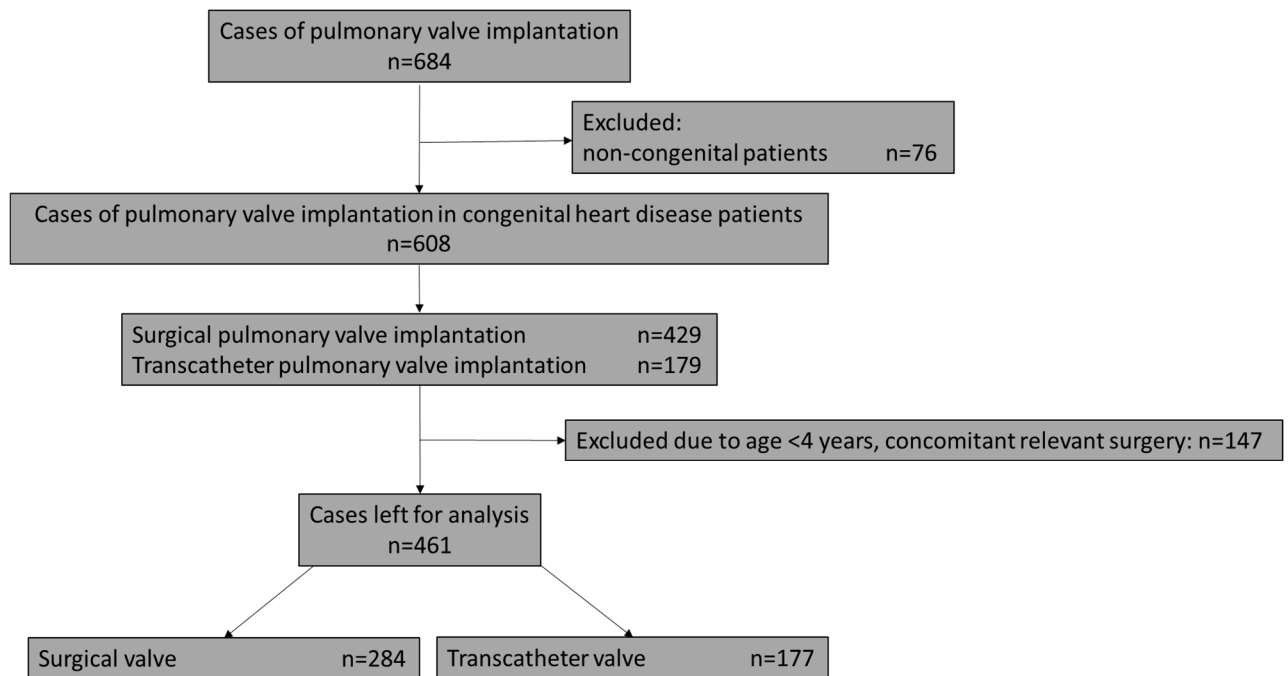

**Table S1:** ICD-10-GM Codes/ OPS diagnosis and procedure codes relevant for analyses.

| Parameter                                                                                                               | Codes                                                                       |
|-------------------------------------------------------------------------------------------------------------------------|-----------------------------------------------------------------------------|
| Type of pulmonary valve implantation                                                                                    | OPS:                                                                        |
| Pulmonary allograft implantation                                                                                        | 5-358.21, 5-351.31, 5-358.29, 5-351.37                                      |
| Pulmonary xenograft implantation                                                                                        | 5-358.22, 5-351.32, 5-351.33                                                |
| Pulmonary mechanic valve implantation                                                                                   | 5-358.24, 5-358.25, 5-351.34                                                |
| Percutaneous pulmonary valve implantation                                                                               | 5-35a.1                                                                     |
| Concomitant surgeries                                                                                                   | OPS:                                                                        |
| subvalvular fibrous/muscular resection                                                                                  | 5-354.22, 5-354.23                                                          |
| supravalvular resection                                                                                                 | 5-354.24                                                                    |
| Total correction of a Tetralogy of Fallot, double outlet right ventricle, correction of absent pulmonary valve syndrome | OPS: 5-359.0, 5-359.30, 5-359.8                                             |
| Aortic valve surgery                                                                                                    | OPS: 5-358.0, 5-350.0, 5-350.1, 5-351.0, 5-353.0, 5-353.6, 5-353.7, 5-354.0 |
| Mitral valve surgery                                                                                                    | OPS: 5-358.1, 5-350.2, 5-350.3, 5-351.1, 5-353.2, 5-354.1                   |
| Coronary artery bypass graft                                                                                            | OPS: 5-36                                                                   |
| Atrial/ventricular septal defect correction                                                                             | OPS: 5-356                                                                  |
| Down syndrome                                                                                                           | ICD: Q90                                                                    |
| Immunodeficiency                                                                                                        | ICD: D80-D90                                                                |
| Cancer diagnosis                                                                                                        | ICD: C00-C97                                                                |
| Myocardial infarction                                                                                                   | ICD: I21, I 22                                                              |
| Heart failure                                                                                                           | ICD: I50, I43, I42                                                          |
| Cardiac arrhythmias                                                                                                     | ICD: I47-I49                                                                |
| Stroke                                                                                                                  | ICD: I63, I64                                                               |
| Arterial hypertension                                                                                                   | ICD: I10, I11, I12, I13, I15                                                |
| Obesity                                                                                                                 | ICD: E66                                                                    |
| Smoking                                                                                                                 | ICD: F17                                                                    |
| Psychiatric and behavioral disorders                                                                                    | ICD: F00-F98, F10, K70, T51.0, T51.9, K29.2, K86.0, I42.6, K85.2            |
| Alcohol abuse                                                                                                           | ICD: G62.1, G72.1, E24.4                                                    |
| Diabetes                                                                                                                | ICD: E10-E14                                                                |
| Chronic kidney disease (severe)                                                                                         | ICD: N18.4, N18.5                                                           |
| Hepatic fibrosis/cirrhosis                                                                                              | ICD: K72.1, K72.7                                                           |
| Endocarditis                                                                                                            | ICD: I33, I38, I39.3                                                        |

**Table S2:** ICD-10 GM-Codes used for identification and grouping of patients with congenital heart disease (CHD).

| Simple CHD                                                                                                |                                                                                                                                            |
|-----------------------------------------------------------------------------------------------------------|--------------------------------------------------------------------------------------------------------------------------------------------|
| Isolated ventricular septal defect                                                                        | Q21.0                                                                                                                                      |
| Persistent arterial duct                                                                                  | Q25.0                                                                                                                                      |
| Isolated congenital valve disease                                                                         | Q23.0, Q23.1, Q22.4, Q22.8, Q22.9, Q23.2, Q23.3, Q22.1, Q22.2, Q22.3                                                                       |
| Other congenital malformation of the great arteries                                                       | Q25.8, Q25.9                                                                                                                               |
| Moderate complexity CHD                                                                                   |                                                                                                                                            |
| Tetralogy of Fallot                                                                                       | Q21.3, Q21.80, (Q22.0 and Q21.0)                                                                                                           |
| Ebstein's anomaly                                                                                         | Q22.5                                                                                                                                      |
| Aortic isthmus stenosis, interrupted aortic arch                                                          | Q25.1, Q25.2                                                                                                                               |
| Atrioventricular septal defect                                                                            | Q21.2                                                                                                                                      |
| Partial anomalous pulmonary venous connection                                                             | Q26.3, Q26.4                                                                                                                               |
| Severely complex CHD                                                                                      |                                                                                                                                            |
| Univentricular heart                                                                                      | Q20.1, Q20.2, Q20.4, Q22.6, Q23.4, (Q22.0 without Q21.0)                                                                                   |
| Eisenmenger's syndrome                                                                                    | I27.8 and at least one further Q-Code with the exception of Q21.1<br>or Q21.88 and at least one further Q-Code with the exception of Q21.1 |
| Transposition of the great arteries (TGA)                                                                 | Q20.3, Q20.5                                                                                                                               |
| Other complex heart malformation, e.g. total anomalous pulmonary venous connection, common arterial trunk | Q20.0, Q26.2                                                                                                                               |

**Figure S2** Kaplan-Meier estimates stratified by type of pulmonary valve for a) infectious endocarditis and the b) combined endpoint of infectious endocarditis and death (TPVI= transcatheter pulmonary valve implantation).

a)

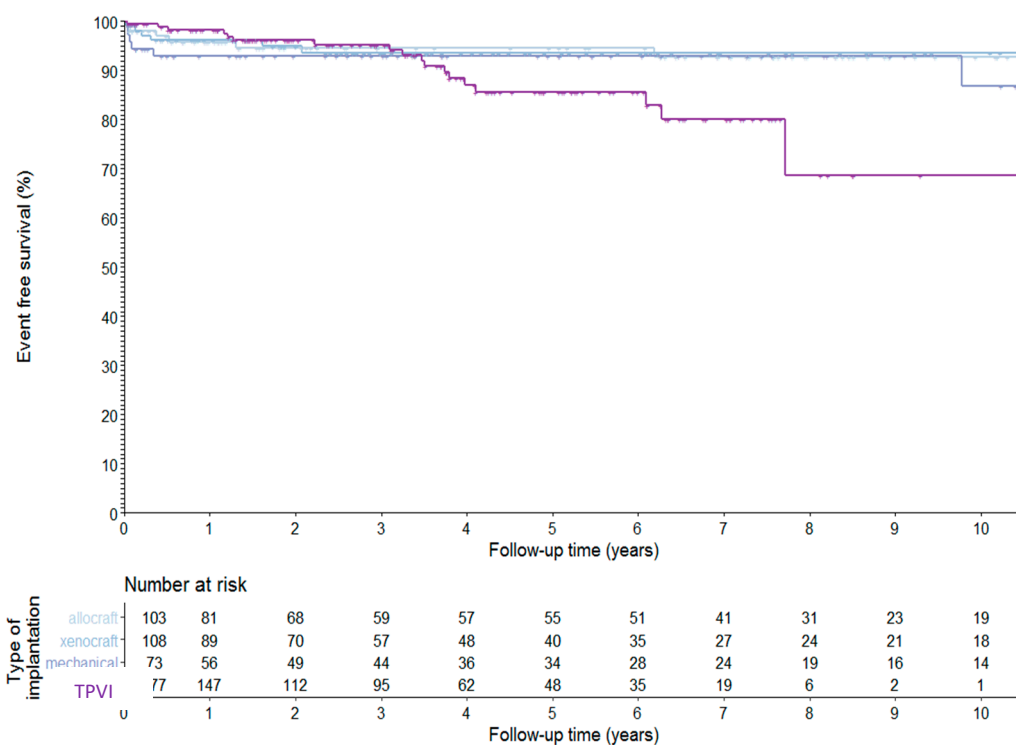

b)

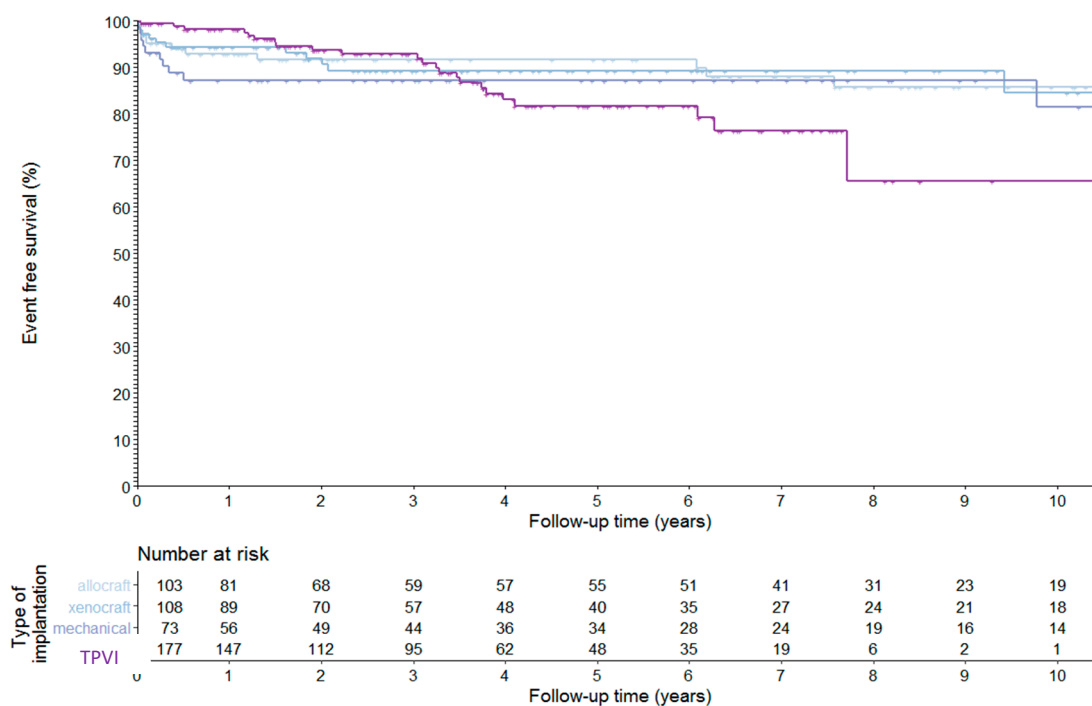

Supplement: s1 [file s1]
